# Supplementary material for: Association Between ICU-Acquired Hypernatremia and In-Hospital Mortality: Data From the Medical Information Mart for Intensive Care III and the Electronic ICU Collaborative Research Database
Source: PubMed Central journal article supplement — Crit Care Explor. 2020 Dec 16;2(12):e0304. doi: 10.1097/CCE.0000000000000304 (PMC7746205; doi:10.1097/cce.0000000000000304), 2020-12-16
Supplement: cc9-2-e0304-s002.pdf [file cc9-2-e0304-s002.pdf]

**Supplemental table 2 – Exploratory multivariable analyses of ICU-acquired  
hyponatremia**

|                                                                    | <b>MIMIC-III</b><br><i>(n = 23,445)</i> |                  | <b>eICU</b><br><i>(n = 88,160)</i> |                  |
|--------------------------------------------------------------------|-----------------------------------------|------------------|------------------------------------|------------------|
| <b>Multivariable logistic regression</b>                           | <b>OR (95% CI)</b>                      | <b>p-value</b>   | <b>OR (95% CI)</b>                 | <b>p-value</b>   |
| Age (numeric, per 10 years)                                        | 1.04 (1.04-1.04)                        | <0.001           | 1.00 (1.00-1.00)                   | 0.001            |
| Male (binary)                                                      | 1.00 (0.99-1.01)                        | 0.952            | 1.00 (1.00-1.01)                   | 0.549            |
| <b>Hyponatremia (binary)</b>                                       | <b>1.15 (1.13-1.17)</b>                 | <b>&lt;0.001</b> | <b>1.11 (1.10-1.12)</b>            | <b>&lt;0.001</b> |
| APS III (numeric, per 10 points)                                   | 1.05 (1.05-1.06)                        | <0.001           | -                                  | -                |
| APACHE IV (numeric, per 10 points)                                 | -                                       | -                | 1.04 (1.04-1.04)                   | <0.001           |
| Number of samples (numeric, per 10 samples)                        | 1.00 (0.99-1.00)                        | 0.125            | 0.99 (0.98-0.99)                   | <0.001           |
| Administration of Hypertonic saline or sodium bicarbonate (binary) | 1.06 (1.04-1.09)                        | <0.001           | -                                  | -                |
| Neurological Ward (binary)                                         | -                                       | -                | 1.02 (1.01-1.03)                   | <0.001           |
| <b>Multivariable Cox regression</b>                                | <b>HR (95% CI)</b>                      | <b>p-value</b>   | <b>HR (95% CI)</b>                 | <b>p-value</b>   |
| Age (numeric, per 10 years)                                        | 1.30 (1.27-1.32)                        | <0.001           | 1.12 (1.09-1.14)                   | <0.001           |
| Male (binary)                                                      | 1.00 (0.95-1.06)                        | 0.862            | 0.99 (0.94-1.05)                   | 0.862            |
| <b>Hyponatremia (binary)</b>                                       | <b>1.59 (1.46-1.73)</b>                 | <b>&lt;0.001</b> | <b>1.85 (1.71-1.99)</b>            | <b>&lt;0.001</b> |
| APS III (numeric, per 10 points)                                   | 1.27 (1.25-1.29)                        | <0.001           | -                                  | -                |
| APACHE IV (numeric, per 10 points)                                 | -                                       | -                | 1.46 (1.45-1.47)                   | <0.001           |
| Number of samples (numeric, per 10 samples)                        | 0.90 (0.88-0.93)                        | <0.001           | 0.82 (0.79-0.85)                   | <0.001           |
| Administration of Hypertonic saline or sodium bicarbonate (binary) | 1.40 (1.28-1.53)                        | <0.001           | -                                  | -                |
| Neurological Ward (binary)                                         | -                                       | -                | 1.35 (1.22-1.50)                   | <0.001           |

APS III: Acute Physiology Score 3; APACHE IV: Acute Physiology And Chronic Health Evaluation IV;

LOS: Length of stay; OR: Odds ratio; HR: Hazard ratio.
