# Supplementary material for: Association Between ICU-Acquired Hypernatremia and In-Hospital Mortality: Data From the Medical Information Mart for Intensive Care III and the Electronic ICU Collaborative Research Database
Source: PubMed Central journal article supplement — Crit Care Explor. 2020 Dec 16;2(12):e0304. doi: 10.1097/CCE.0000000000000304 (PMC7746205; doi:10.1097/cce.0000000000000304), 2020-12-16
Supplement: cc9-2-e0304-s003.pdf [file cc9-2-e0304-s003.pdf]

**Supplemental table 3 – Exploratory multivariable analyses of sodium correction rate and association with in-hospital mortality**

|                                                                    | MIMIC-III<br>(n = 2,982) |                  | eICU<br>(n = 8,594)     |                  |
|--------------------------------------------------------------------|--------------------------|------------------|-------------------------|------------------|
| <b>Multivariable logistic regression</b>                           | <b>OR (95% CI)</b>       | <b>p-value</b>   | <b>OR (95% CI)</b>      | <b>p-value</b>   |
| Age (numeric, per 10 years)                                        | 1.04 (1.03-1.05)         | <0.001           | 1.00 (1.00-1.01)        | 0.244            |
| Male (binary)                                                      | 1.02 (0.98-1.07)         | 0.312            | 1.02 (0.99-1.04)        | 0.186            |
| <b>Sodium correction rate</b> (numeric, per 1 mmol/L/h)            | <b>1.07 (1.02-1.13)</b>  | <b>0.003</b>     | <b>1.09 (1.06-1.12)</b> | <b>&lt;0.001</b> |
| APS III (numeric, per 10 points)                                   | 1.03 (1.02-1.05)         | <0.001           | -                       | -                |
| APACHE IV (numeric, per 10 points)                                 | -                        | -                | 1.03 (1.03-1.04)        | <0.001           |
| Number of samples (numeric, per 10 samples)                        | 0.98 (0.97-0.99)         | <0.001           | 0.97 (0.97-0.98)        | <0.001           |
| Administration of Hypertonic saline or sodium bicarbonate (binary) | 1.00 (0.95-1.06)         | 0.883            | -                       | -                |
| Neurological Ward (binary)                                         | -                        | -                | 1.07 (1.03-1.11)        | <0.001           |
| <b>Multivariable Cox regression</b>                                | <b>HR (95% CI)</b>       | <b>p-value</b>   | <b>HR (95% CI)</b>      | <b>p-value</b>   |
| Age (numeric, per 10 years)                                        | 1.13 (1.07-1.18)         | <0.001           | 1.00 (0.96-1.04)        | 0.920            |
| Male (binary)                                                      | 1.07 (0.93-1.22)         | 0.332            | 1.08 (0.96-1.21)        | 0.218            |
| <b>Sodium correction rate</b> (numeric, per 1 mmol/L/h)            | <b>1.32 (1.16 -1.51)</b> | <b>&lt;0.001</b> | <b>1.47 (1.32-1.63)</b> | <b>&lt;0.001</b> |
| APS III (numeric, per 10 points)                                   | 1.12 (1.09-1.16)         | <0.001           | -                       | -                |
| APACHE IV (numeric, per 10 points)                                 | -                        | -                | 1.19 (1.16-1.21)        | <0.001           |
| Number of samples (numeric, per 10 samples)                        | 0.84 (0.81-0.89)         | <0.001           | 0.80 (0.75-0.84)        | <0.001           |
| Administration of Hypertonic saline or sodium bicarbonate (binary) | 1.12 (0.94-1.33)         | 0.212            | -                       | -                |
| Neurological Ward (binary)                                         | -                        | -                | 1.51 (1.25-1.82)        | <0.001           |

APS III: Acute Physiology Score 3; APACHE IV: Acute Physiology And Chronic Health Evaluation IV;

LOS: Length of stay; OR: Odds ratio; HR: Hazard ratio.
