# Supplementary material for: Association Between ICU-Acquired Hypernatremia and In-Hospital Mortality: Data From the Medical Information Mart for Intensive Care III and the Electronic ICU Collaborative Research Database
Source: PubMed Central journal article supplement — Crit Care Explor. 2020 Dec 16;2(12):e0304. doi: 10.1097/CCE.0000000000000304 (PMC7746205; doi:10.1097/cce.0000000000000304), 2020-12-16
Supplement: cc9-2-e0304-s004.pdf [file cc9-2-e0304-s004.pdf]

**Supplemental table 1 - Subgroup analysis of survival based on hypernatremic severity.**

|                                            | <b>MIMIC-III</b><br>( <i>n</i> = 23,445) |                   |                       | <b>eICU</b><br>( <i>n</i> = 88,160) |                  |                       |
|--------------------------------------------|------------------------------------------|-------------------|-----------------------|-------------------------------------|------------------|-----------------------|
| -                                          | <b>N</b>                                 | <b>Mortality*</b> | <b><i>p</i>-value</b> | <b>N</b>                            | <b>Mortality</b> | <b><i>p</i>-value</b> |
| Normonatremia<br>(135-145 mmol/L)          | 21,273                                   | 20 (19-20) %      | <0.001                | 82,370                              | 6 (5-6) %        | <0.001                |
| Moderate hypernatremia<br>(145-155 mmol/L) | 2,104                                    | 41 (39-43) %      | <0.001                | 5,356                               | 21 (20-22) %     | <0.001                |
| Severe hypernatremia<br>(>155 mmol/L)      | 68                                       | 72 (61-83) %      | <0.001                | 434                                 | 41 (36-46) %     | <0.001                |

\* Mortality is shown in percent with 95% confidence interval. *P*-value shown is the Fisher's exact test, with Bonferroni correction.
